# Supplementary material
Source: PubMed Central journal article supplement (PMC4773048)

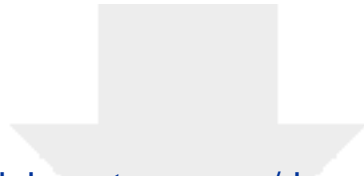

Click here to access/download

**Supplementary Material (video clip optional)**  
Supplemental\_Table1.docx

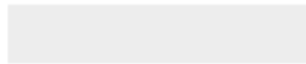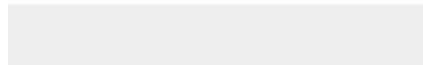

Supplement: NIHMS760003-supplement-supplement_1.pdf [file NIHMS760003-supplement-supplement_1.pdf]
